# Supplementary material for: A Case Study for Large-Scale Human Microbiome Analysis Using JCVI’s Metagenomics Reports (METAREP)
Source: PLoS One. 2012 Jun 13;7(6):e29044. doi: 10.1371/journal.pone.0029044 (PMC3374610; doi:10.1371/journal.pone.0029044)
Supplement: Table S1 — Enzymatic marker counts across phyla and body habitats. (XLS) [file pone.0029044.s004.xls]

## Sheet: PDHC
Supplementary Table S1
Pyruvate dehydrogenase complex (PDHC)
JCVI Metagenomics Reports - Comparison Results Version: 1.3.0-beta Date: April 9, 2011, 2:58 pm Query: ec_id: 1.2.4.1 OR ec_id: 2.3.1.12 OR ec_id: 1.8.1.4 Datasets: anterior-nares-mtr buccal-mucosa-mtr keratinized-gingiva-mtr l-retroauricular-crease-mtr mid-vagina-mtr palatine-tonsils-mtr posterior-fornix-mtr r-retroauricular-crease-mtr saliva-mtr stool-mtr subgingival-plaque-mtr supragingival-pl…
ID	Category	anterior-nares-mtr	buccal-mucosa-mtr	keratinized-gingiva-mtr	l-retroauricular-crease-mtr	mid-vagina-mtr	palatine-tonsils-mtr	posterior-fornix-mtr	r-retroauricular-crease-mtr	saliva-mtr	stool-mtr	subgingival-plaque-mtr	supragingival-plaque-mtr	throat-mtr	tongue-dorsum-mtr	vaginal-introitus-mtr	Total
57723	Acidobacteria	78.78	1901-04-10 13:55:12	10.11	117.01	0.02	72.57	6.23	290.52	21.56	3375.65	89.74	2806.17	86.44	711.7	0.36	8133.44
201174	Actinobacteria	79677	234961	4477.81	220134	26.05	8096.57	1458.2	579931	2475.77	44557.9	52116.3	1.86183e+06	10833.4	309404	36.74	3.41001e+06
5794	Apicomplexa	21.44	519.66	6.9	12.77	0	93.11	47.02	55.39	22.48	4005.81	53.57	1706.63	96.72	597.24	1.59	7240.33
200783	Aquificae	35.86	993.95	31.93	91.31	0	38.74	12.23	225.73	21.47	1675.85	49.64	1893.14	57.19	510.96	2.01	5640.01
6656	Arthropoda	943.5	5494.09	182.32	895.81	2.54	450.9	186.16	3448.4	176.96	19134.7	1855.37	51630.7	382.74	6419.59	4.62	91208.3
4890	Ascomycota	1103.03	3862.96	65.71	1516.9	0	340.34	152.78	5418.64	85.6	8966.51	549.9	17684.4	475.51	3444.57	1.35	43668.2
2836	Bacillariophyta	47.28	325.28	9.14	106.53	0.88	27.27	36.45	362.43	7.1	1278.91	109.93	2967.69	55.55	442.66	0.32	5777.42
976	Bacteroidetes	939.03	54051.5	744.89	387.49	1.51	4470.66	889.97	1022.34	1742.22	822822	14335.8	524023	10135.8	28517.6	16.86	1.4641e+06
5204	Basidiomycota	1417.27	1725.31	42.17	2099.94	0	58.59	18.34	7534.66	24.76	1824.54	123.11	3920.28	84.13	586.26	0.04	19459.4
204428	Chlamydiae	36.7	3080.67	80.58	24.13	0	243.2	63.77	74.91	69.63	3928.1	211.1	6031.39	189.21	2358.72	0.58	16392.7
1090	Chlorobi	41.77	904.49	30.03	50.76	0.24	137.93	64.5	202.21	43.63	4729.45	262.24	6822.67	202.82	1205.79	1.28	14699.8
200795	Chloroflexi	353.56	4372.76	104.76	583.21	2.73	380.73	309.82	1518.27	124.62	12442.2	870.3	26909	470.68	5393.43	9.93	53846
3041	Chlorophyta	146.74	1075.74	30.6	61.67	0.44	61.08	42.53	212.68	29.45	1235.56	157.51	5685.68	83.63	1285.71	0.2	10109.2
7711	Chordata	418.06	4160.13	166.31	430.48	1.26	464.8	155.95	1820.78	155.6	6772.42	992.8	31751.2	609.96	5102.28	1.73	53003.8
6073	Cnidaria	61.36	398.63	3.56	109.74	0	19.12	2.14	357.41	5.39	191.76	33.16	1128.61	26.03	144.88	0.14	2481.93
28889	Crenarchaeota	343.57	3549.19	98.31	395.85	0.25	240.33	212.84	1069.71	68.6	9925.96	384.58	11767.1	259.67	2575.6	1.27	30892.9
1117	Cyanobacteria	252.26	3452.44	100.49	105.75	0.01	786.16	132.27	384.6	205.17	7191.36	920.89	25034.9	677.3	5946.97	1.94	45192.5
200930	Deferribacteres	0.38	3.93	0.04	0.17	0	3.1	6.16	0.56	0.08	165.49	1.3	31.15	0.95	14.68	0	227.99
1297	Deinococcus-Thermus	257.7	9588.93	229.32	366.79	0.13	332	53.8	978.73	107.86	4633.78	450.14	14733	408.27	3404.71	1.21	35546.4
68297	Dictyoglomi	18.41	301.03	3.33	14.27	0.08	18.71	21.5	55.4	6.72	531.44	11.55	361.23	22.85	330.33	1.69	1698.54
7586	Echinodermata	16.71	58.96	1.28	21.21	0.02	10.78	2.74	81.7	4.41	68.92	11.79	257.68	18.96	68.88	0	624.04
74152	Elusimicrobia	1.88	53.51	1	6.51	0	21.68	11.29	19.87	2.23	620.75	18.74	348.46	7.07	101.72	0	1214.71
28890	Euryarchaeota	420.91	5015.95	138.31	634.29	0.26	470.59	105.6	1900	153.59	12935	655.4	17937.6	497.66	4950.66	3.72	45819.5
1239	Firmicutes	33499.2	1.10338e+06	29873.5	18807.4	18.45	44648.6	20448.8	54787.4	14939.4	178991	27151.5	1.04162e+06	35085.8	527825	49.38	3.13113e+06
32066	Fusobacteria	201.56	101856	2716.48	80.8	0.21	3384.23	1755.2	169.82	1225.42	2913.22	3044.01	112116	2346.09	32859.6	0.18	264669
142182	Gemmatimonadetes	31.11	657.55	13.01	16.02	0	63	7.32	61.72	43.22	741.51	90.64	3079.38	120.83	818.04	0.9	5744.25
6029	Microsporidia	0.85	3.33	0	0.25	0	1.36	1.13	1.02	0.18	12.83	0.79	21.99	0.71	6.5	0	50.94
6231	Nematoda	71.13	194	4.17	91.95	0	16.27	22.03	325.41	5.73	1053.8	51.25	1278.91	18.88	166.65	0.05	3300.23
40117	Nitrospirae	0.84	19.88	0.09	0.14	0	4.56	36.67	0.32	1.02	148.73	5.6	175.28	6.55	25.12	0	424.8
10226	Placozoa	20.24	147.91	1.02	35.17	0	5.69	3.18	126.13	1.3	58.68	12.47	361.75	8.5	39.65	0	821.69
203682	Planctomycetes	37.33	392.72	14.45	55.03	0	43.72	10.08	149.46	22.69	2806.95	69.16	2394.09	44.04	587.17	0.57	6627.46
6157	Platyhelminthes	26.95	10.15	0.01	47.97	0	0.65	0.18	164.17	0.12	95.32	2.16	99.04	1.8	6.37	0.03	454.92
1224	Proteobacteria	13279.5	514407	14231.5	13370.9	68.07	45294.5	3819.9	42677.1	13018.5	198476	34946.4	1.33931e+06	57961.5	462911	180.37	2.75395e+06
203691	Spirochaetes	125.13	1676.03	53.61	216.67	0.17	280.98	61.91	656.1	76.11	4208.07	650.09	14661.1	339.98	2555.45	3.35	25564.7
35493	Streptophyta	288.56	2287.95	51.06	320.98	0.35	203.39	135.25	1088.56	48.18	6171.26	581.05	19383.4	284.6	2205.64	8.99	33059.2
508458	Synergistetes	11.95	604.6	7.5	8.43	0	119.96	10.49	25.34	32.74	5012.64	149.37	1708.74	107.4	846.23	0.36	8645.75
544448	Tenericutes	226.46	3104.72	65.09	342.12	0.15	483.67	216.78	982.53	119.37	12430.7	530.6	13100.9	507.84	4907.19	4.27	37022.3
200918	Thermotogae	21.31	615.24	17.37	11.75	0.04	80.44	24.82	31.81	28.92	8425.83	89.64	2307.04	77.87	795.61	0	12527.7
74201	Verrucomicrobia	48.76	1515.93	27.63	74.4	0.24	142.75	54.99	166.88	36.71	26374.2	327.69	9123.86	170.01	1300.12	0.18	39364.4

## Sheet: PFOR
Supplementary Table S1
Pyruvate ferredoxin oxidoreductase (PFOR)
JCVI Metagenomics Reports - Comparison Results Version: 1.3.0-beta Date: April 9, 2011, 2:59 pm Query: ec_id:1.2.7.1 Datasets: anterior-nares-mtr buccal-mucosa-mtr keratinized-gingiva-mtr l-retroauricular-crease-mtr mid-vagina-mtr palatine-tonsils-mtr posterior-fornix-mtr r-retroauricular-crease-mtr saliva-mtr stool-mtr subgingival-plaque-mtr supragingival-plaque-mtr throat-mtr tongue-dorsum-mtr …
ID	Category	anterior-nares-mtr	buccal-mucosa-mtr	keratinized-gingiva-mtr	l-retroauricular-crease-mtr	mid-vagina-mtr	palatine-tonsils-mtr	posterior-fornix-mtr	r-retroauricular-crease-mtr	saliva-mtr	stool-mtr	subgingival-plaque-mtr	supragingival-plaque-mtr	throat-mtr	tongue-dorsum-mtr	vaginal-introitus-mtr	Total
201174	Actinobacteria	1282.42	1900-01-30 03:50:24	0.89	157.19	0.13	1.91	19.18	668.45	9.94	6956.83	4.12	138.71	12.7	32.13	3.26	9318.02
200783	Aquificae	14.72	35.48	0.02	3.35	0	16.02	2.66	14.34	7.82	1916.37	43.31	263.06	27.66	81.17	0.91	2426.89
976	Bacteroidetes	26.24	76.17	1.84	3.53	0	56.91	0.96	11.71	11.1	1864.3	9.08	252.67	33.05	330.89	0	2678.45
200795	Chloroflexi	53.11	24.82	0.53	10.19	0	14.96	1.74	50.58	5.29	3277.46	9.87	77.21	7.46	39.9	0.24	3573.36
28889	Crenarchaeota	2794.42	816.9	43.25	8545.98	0.33	303.04	94.07	22455.5	102.35	60003.7	379.32	5815.77	347.91	1884.98	1.27	103589
68297	Dictyoglomi	14.47	112.05	1.25	24.62	0	76.4	1.73	137.23	32.43	6797.78	19.14	401.4	89.05	274.64	0	7982.19
28890	Euryarchaeota	2984.47	755.45	28.01	731.93	0.69	289.67	183.83	2789.11	103.33	112737	421.25	4550.84	244.22	1936.38	5.98	127762
1239	Firmicutes	418.54	1958.42	29.42	519.83	0	736.64	85.63	2914.17	269.55	122603	284.77	6927.19	686.05	2730.6	12.31	140176
51967	Korarchaeota	22.99	30.56	0.41	4.15	0	7.01	2.71	32.86	3.43	2383.9	8.17	152.68	9.7	48.12	0.11	2706.8
40117	Nitrospirae	45.35	88.97	0.66	27.68	0	42.4	1.9	117.65	16.55	4533.6	24.14	744.73	39.47	177.54	0.1	5860.74
1224	Proteobacteria	3472.32	1168.97	20.56	454.5	0.19	263.73	71.1	1247.78	82.86	41741.7	205.1	2689.27	240.01	1287.24	4.47	52949.8
203691	Spirochaetes	0.05	1.33	0	0	0	0	0	0	0	782.49	0.01	1.34	0.02	0.56	0	785.8
508458	Synergistetes	10.24	47.33	1.63	1.45	0	27.01	2.13	3.75	8.38	5436.43	14.3	205.29	23.38	120.96	0	5902.28
200918	Thermotogae	43.42	380.63	3.2	20.06	0.19	196.29	67.29	120.7	63.94	43707.4	180.67	2066.41	210.89	1117.73	1.59	48180.4

## Sheet: PFL
Supplementary Table S1
Pyruvate formate lyase (PFL)
JCVI Metagenomics Reports - Comparison Results Version: 1.3.0-beta Date: April 9, 2011, 3:06 pm Query: ec_id:2.3.1.54 Datasets: anterior-nares-mtr buccal-mucosa-mtr keratinized-gingiva-mtr l-retroauricular-crease-mtr mid-vagina-mtr palatine-tonsils-mtr posterior-fornix-mtr r-retroauricular-crease-mtr saliva-mtr stool-mtr subgingival-plaque-mtr supragingival-plaque-mtr throat-mtr tongue-dorsum-mtr…
ID	Category	anterior-nares-mtr	buccal-mucosa-mtr	keratinized-gingiva-mtr	l-retroauricular-crease-mtr	mid-vagina-mtr	palatine-tonsils-mtr	posterior-fornix-mtr	r-retroauricular-crease-mtr	saliva-mtr	stool-mtr	subgingival-plaque-mtr	supragingival-plaque-mtr	throat-mtr	tongue-dorsum-mtr	vaginal-introitus-mtr	Total
ID	Category	anterior-nares-mtr	buccal-mucosa-mtr	keratinized-gingiva-mtr	l-retroauricular-crease-mtr	mid-vagina-mtr	palatine-tonsils-mtr	posterior-fornix-mtr	r-retroauricular-crease-mtr	saliva-mtr	stool-mtr	subgingival-plaque-mtr	supragingival-plaque-mtr	throat-mtr	tongue-dorsum-mtr	vaginal-introitus-mtr	Total
201174	Actinobacteria	6195.24	16278.3	649.61	195.03	8.21	2228.18	11287	295.27	544.21	38614.6	6110.54	184703	3180.35	37484.1	30.19	307804
976	Bacteroidetes	376.48	6431.04	215.71	24.56	0.14	1994.3	1393.96	61.32	469.22	392605	1409.36	27870.2	1575.13	9671.94	0.83	444099
3041	Chlorophyta	4.26	79.43	2.07	0.42	0	22.22	25.57	1.85	4.5	1024.92	16.35	486.05	28.13	257.92	0.05	1953.74
1117	Cyanobacteria	238.95	4003.1	204.93	15.43	0.27	1033.93	1277.23	40.67	259.68	26460	866.34	20230.6	1022.21	7478.15	1.09	63132.6
200930	Deferribacteres	1.7	52.56	0.36	0.2	0	18.67	1.75	0.48	2.99	7005.22	43.24	439.84	13.12	113.34	0	7693.47
28890	Euryarchaeota	3.24	68.11	1.57	0.3	0.12	13.41	7.02	1.34	3.21	10386.2	31.11	485.34	11.37	119.7	0	11132
65842	Fibrobacteres	42.55	963.76	28.03	3.18	0.08	462.72	862.02	7.65	125.54	15374.6	329.66	5273.75	347.39	2838.75	0.19	26659.9
1239	Firmicutes	8703.63	511043	17896.7	2570.51	4.08	29331.7	39609.4	7240.61	9583.27	678519	17927.6	539025	24135.5	266151	13.05	2.15175e+06
32066	Fusobacteria	311.36	8391.39	326.89	17.32	0.15	1434.4	1590.8	29.89	290.58	14318.4	2222.39	57051.1	1487.38	11991	0.65	99463.7
51967	Korarchaeota	0.67	14.76	0.51	0	0.04	3.52	0.7	0.14	0.71	2717.17	9.3	101.22	3.17	30.1	0	2882.01
1224	Proteobacteria	3357.59	179990	4430.59	263.15	1.75	18146.7	9935.28	611.73	4973.33	268892	12616	417468	17153.7	152495	13	1.09035e+06
508458	Synergistetes	6.09	34.23	0.59	0.2	0	5.46	1.94	1.04	1.12	14208.7	10.89	190.38	4.37	67.47	0	14532.5
544448	Tenericutes	39.36	501.13	14.44	1.62	0.03	126.72	111.45	3.42	29.87	3134.45	74	1840.47	119.16	861.67	0.07	6857.86
200918	Thermotogae	0.58	16.29	0.42	0	0.04	3.63	0.2	0.23	1.73	1825.44	9.18	192.74	3.83	31.14	0	2085.45
74201	Verrucomicrobia	127.02	918.7	46.03	6.98	0.07	290.39	272.35	12.16	74.28	10225.1	249.47	6372.98	319.66	2415.05	0.31	21330.5
