# Supplementary material for: A Case Study for Large-Scale Human Microbiome Analysis Using JCVI’s Metagenomics Reports (METAREP)
Source: PLoS One. 2012 Jun 13;7(6):e29044. doi: 10.1371/journal.pone.0029044 (PMC3374610; doi:10.1371/journal.pone.0029044)
Supplement: Table S2 — Body habitat and gender statistic for 168 samples with 1st and 2nd visits. (XLS) [file pone.0029044.s005.xls]

## Sheet: 168 samples
Supplementary Table S2
Body habitat and gender breakdown for 168 samples with 1st and 2nd visits (Figure S2 and S3)
The number of donors for each habitat is not unique, i.e. the same donor may have more than one body site sampled
Body Habitat	Male Donors	Male Samples (1st/2nd visit)	Female Donors	Female Samples (1st/2nd visit)
Stool	3	6	5	10
Supragingival plaque	11	22	5	10
Buccal mucosa	15	30	8	16
Tongue dorsum	1	2	0	0
Right retroauricular crease	1	2	0	0
Posterior fornix	0	0	10	20
Anterior nares	12	24	1	2
Subgingival plaque	1	2	1	2
Left retroauricular crease	1	2	0	0
Palatine tonsils	1	2	1	2
Throat	2	4	1	2
Keratinized gingiva	0	0	0	0
Saliva	1	2	1	2
Vaginal introitus	0	0	1	2
Mid vagina	0	0	1	2
		98		70

## Sheet: 48 samples
Supplementary Table S2
Body habitat and gender breakdown for 48 samples with 1st and 2nd visits (Figure 3)
Body habitat and gender breakdown for 48 samples with 1st and 2nd visits (Figure 3)
Balanced for donors and habitat. Every sample pair (1st and 2nd visit is taken from a different donor. Two samples (1st and second visit) from three male and three female donors were randomly selected for stool, buccal mucosa and supragingival-plaque. Two samples (1st and second visit) from three males were selected for Anterior nares (no female samples). Two sample pairs from three female donors…
Body Habitat	Male Donors	Male Samples (1st/2nd visit)	Female Donors	Female Samples (1st/2nd visit)
Stool	3	6	3	6
Supragingival plaque	3	6	3	6
Buccal mucosa	3	6	3	6
Posterior fornix	0	0	3	6
Anterior nares	3	6	0	0
	12	24	12	24
