# Supplementary material for: A Case Study for Large-Scale Human Microbiome Analysis Using JCVI’s Metagenomics Reports (METAREP)
Source: PLoS One. 2012 Jun 13;7(6):e29044. doi: 10.1371/journal.pone.0029044 (PMC3374610; doi:10.1371/journal.pone.0029044)
Supplement: Table S3 — Differentially abundant phyla (buccal mucosa vs. tongue dorsum). (XLS) [file pone.0029044.s006.xls]

## Sheet: wc_bucal_vs_plaque
Supplementary Table S3
Wilcoxon rank-sum test (buccal mucosa vs. supragingival plaque)
----------------------------------------------------------
JCVI Metagenomics Reports - Comparison Results - Wilcoxon Signed Rank Test
Version:	1.2.4-beta
Date:		May 9, 2011, 2:20 pm
Query:		*:* NOT blast_tree:7711
Datasets:
		buccal-mucosa-mtr
		supragingival-plaque-mtr
----------------------------------------------------------
Enriched in Buccal muccosa
ID	Category	%Median (buccal-mucosa-mtr)	%MAD (buccal-mucosa-mtr)	%Median (supragingival-plaque-mtr)	%MAD (supragingival-plaque-mtr)	Median Ratio	P-Value	P-Value (Bonf. Corr.)
1239	Firmicutes	59.5329	14.8961	22.4578	6.4718	2.651	0	0
Enriched in Supragingival plaque
ID	Category	%Median (buccal-mucosa-mtr)	%MAD (buccal-mucosa-mtr)	%Median (supragingival-plaque-mtr)	%MAD (supragingival-plaque-mtr)	Median Ratio	P-Value	P-Value (Bonf. Corr.)
201174	Actinobacteria	3.6791	3.5353	22.9923	11.7959	0.16	0	0
976	Bacteroidetes	1.9719	1.5569	8.6524	5.0207	0.228	0	0
32066	Fusobacteria	0.8244	0.5093	2.9974	2.6457	0.275	0	0
6073	Cnidaria	0.0118	0.0065	0.0425	0.0159	0.278	0	0
142182	Gemmatimonadetes	0.0116	0.0068	0.0384	0.0093	0.302	0	0
7586	Echinodermata	0.0072	0.0036	0.022	0.0076	0.327	0	0
200795	Chloroflexi	0.1416	0.0621	0.4296	0.1075	0.33	0	0
1297	Deinococcus-Thermus	0.0696	0.0302	0.2051	0.0426	0.339	0	0
6231	Nematoda	0.0095	0.0036	0.0273	0.0085	0.348	0	0
1090	Chlorobi	0.1381	0.0772	0.3878	0.1626	0.356	0	0
204428	Chlamydiae	0.023	0.0117	0.0644	0.0305	0.357	0	0
51967	Korarchaeota	0.0021	0.001	0.0058	0.0022	0.362	0	0
3041	Chlorophyta	0.0115	0.0058	0.0318	0.0086	0.362	0	0
10226	Placozoa	0.0028	0.0014	0.0076	0.0022	0.368	0	0
203691	Spirochaetes	0.146	0.0704	0.3961	0.2959	0.369	0	0
6656	Arthropoda	0.0787	0.0309	0.2125	0.0658	0.37	0	0
74201	Verrucomicrobia	0.0467	0.0262	0.1253	0.04	0.373	0	0
57723	Acidobacteria	0.042	0.0183	0.1114	0.028	0.377	0	0
203682	Planctomycetes	0.0225	0.01	0.0593	0.0132	0.379	0	0
508458	Synergistetes	0.0264	0.013	0.0688	0.0337	0.384	0	0
35493	Streptophyta	0.0738	0.0288	0.1916	0.05	0.385	0	0
2836	Bacillariophyta	0.0071	0.0033	0.0184	0.005	0.386	0	0
74152	Elusimicrobia	0.0083	0.004	0.0212	0.009	0.392	0	0
4890	Ascomycota	0.104	0.0406	0.2633	0.0581	0.395	0	0
200783	Aquificae	0.0664	0.0268	0.1628	0.0685	0.408	0	0
200930	Deferribacteres	0.0352	0.0163	0.0847	0.0405	0.416	0	0
6157	Platyhelminthes	0.002	0.0009	0.0048	0.0012	0.417	0	0
1117	Cyanobacteria	0.3208	0.1333	0.7632	0.184	0.42	0	0
28889	Crenarchaeota	0.0494	0.0156	0.1129	0.0249	0.438	0	0
40117	Nitrospirae	0.0137	0.0053	0.0307	0.0151	0.446	0	0
200918	Thermotogae	0.1235	0.0447	0.2641	0.1103	0.468	0	0
68297	Dictyoglomi	0.0302	0.0112	0.0633	0.0282	0.477	0	0
28890	Euryarchaeota	0.2499	0.0781	0.5234	0.1489	0.477	0	0
5794	Apicomplexa	0.0252	0.0088	0.0525	0.0111	0.48	0	0
6029	Microsporidia	0.0004	0.0001	0.0008	0.0003	0.5	0	0
192989	Nanoarchaeota	0.0005	0.0003	0.001	0.0006	0.5	0	0
651137	Thaumarchaeota	0.0036	0.0012	0.0069	0.0021	0.522	0	0
65842	Fibrobacteres	0.031	0.0121	0.0558	0.0267	0.556	0	0
5204	Basidiomycota	0.0298	0.0157	0.0457	0.0119	0.652	0	0
544448	Tenericutes	0.118	0.0375	0.1603	0.0676	0.736	1e-06	4.2e-05
544448	Tenericutes	0.001179	0.000376	0.001595	0.000664	0.739	1e-06	4.3e-05

## Sheet: wc_bucal_vs_tongue
Supplementary Table S3
Wilcoxon rank-sum test (buccal mucosa vs. tongue dorsum)
----------------------------------------------------------
JCVI Metagenomics Reports - Comparison Results - Wilcoxon Signed Rank Test
Version:	1.2.4-beta
Date:		May 9, 2011, 2:16 pm
Query:		*:* NOT blast_tree:7711
Datasets:
		buccal-mucosa-mtr
		tongue-dorsum-mtr
----------------------------------------------------------
Enriched in Buccal muccosa
ID	Category	%Median (buccal-mucosa-mtr)	%MAD (buccal-mucosa-mtr)	%Median (tongue-dorsum-mtr)	%MAD (tongue-dorsum-mtr)	Median Ratio	P-Value	P-Value (Bonf. Corr.)
1239	Firmicutes	59.5329	14.8961	43.4014	8.9439	1.372	0	0
Enriched in Tongue
ID	Category	%Median (buccal-mucosa-mtr)	%MAD (buccal-mucosa-mtr)	%Median (tongue-dorsum-mtr)	%MAD (tongue-dorsum-mtr)	Median Ratio	P-Value	P-Value (Bonf. Corr.)
976	Bacteroidetes	1.9719	1.5569	6.0537	2.0842	0.326	0	0
201174	Actinobacteria	3.6791	3.5353	11.2772	7.0115	0.326	1.8e-05	0.000756
32066	Fusobacteria	0.8244	0.5093	2.4361	1.7306	0.338	0	0
51967	Korarchaeota	0.0021	0.001	0.0054	0.0016	0.389	0	0
508458	Synergistetes	0.0264	0.013	0.0675	0.0188	0.391	0	0
1090	Chlorobi	0.1381	0.0772	0.3456	0.1291	0.4	0	0
74201	Verrucomicrobia	0.0467	0.0262	0.1153	0.0411	0.405	0	0
204428	Chlamydiae	0.023	0.0117	0.0553	0.0187	0.416	0	0
200783	Aquificae	0.0664	0.0268	0.1596	0.0434	0.416	0	0
74152	Elusimicrobia	0.0083	0.004	0.0199	0.0071	0.417	0	0
203682	Planctomycetes	0.0225	0.01	0.0539	0.0142	0.417	0	0
200930	Deferribacteres	0.0352	0.0163	0.0826	0.0243	0.426	0	0
10226	Placozoa	0.0028	0.0014	0.0065	0.0019	0.431	0	0
40117	Nitrospirae	0.0137	0.0053	0.0313	0.0098	0.438	0	0
68297	Dictyoglomi	0.0302	0.0112	0.0687	0.0163	0.44	0	0
200918	Thermotogae	0.1235	0.0447	0.2742	0.0771	0.45	0	0
203691	Spirochaetes	0.146	0.0704	0.3235	0.1229	0.451	0	0
200795	Chloroflexi	0.1416	0.0621	0.3089	0.107	0.458	0	0
142182	Gemmatimonadetes	0.0116	0.0068	0.0247	0.0077	0.47	0	0
2836	Bacillariophyta	0.0071	0.0033	0.0148	0.0058	0.48	0	0
65842	Fibrobacteres	0.031	0.0121	0.0643	0.0182	0.482	0	0
1297	Deinococcus-Thermus	0.0696	0.0302	0.1426	0.0497	0.488	0	0
3041	Chlorophyta	0.0115	0.0058	0.0234	0.0077	0.491	0	0
651137	Thaumarchaeota	0.0036	0.0012	0.0073	0.0019	0.493	0	0
57723	Acidobacteria	0.042	0.0183	0.0843	0.0258	0.498	0	0
1117	Cyanobacteria	0.3208	0.1333	0.6203	0.1739	0.517	0	0
7586	Echinodermata	0.0072	0.0036	0.0139	0.0033	0.518	2e-06	8.4e-05
28889	Crenarchaeota	0.0494	0.0156	0.0952	0.0228	0.519	0	0
28890	Euryarchaeota	0.2499	0.0781	0.471	0.1036	0.531	0	0
6157	Platyhelminthes	0.002	0.0009	0.0037	0.0007	0.541	0	0
6073	Cnidaria	0.0118	0.0065	0.0218	0.0065	0.541	0	0
35493	Streptophyta	0.0738	0.0288	0.1348	0.0331	0.547	0	0
6231	Nematoda	0.0095	0.0036	0.0171	0.0052	0.556	0	0
4890	Ascomycota	0.104	0.0406	0.1742	0.039	0.597	0	0
544448	Tenericutes	0.118	0.0375	0.1938	0.0549	0.609	0	0
192989	Nanoarchaeota	0.0005	0.0003	0.0008	0.0001	0.625	7e-06	0.000294
6656	Arthropoda	0.0787	0.0309	0.1251	0.0308	0.629	9.5e-05	0.00399
5794	Apicomplexa	0.0252	0.0088	0.0391	0.0064	0.645	2e-06	8.4e-05
6029	Microsporidia	0.0004	0.0001	0.0006	0.0001	0.667	4e-06	0.000168

## Sheet: wc_plaque_vs_tongue
Supplementary Table S3
Wilcoxon rank-sum test (supragingival plaque vs. tongue dorsum)
----------------------------------------------------------
JCVI Metagenomics Reports - Comparison Results - Wilcoxon Signed Rank Test
Version:	1.2.4-beta
Date:		April 27, 2011, 4:35 pm
Query:		*:* NOT blast_tree:7711
Datasets:
		supragingival-plaque-mtr
		tongue-dorsum-mtr
----------------------------------------------------------
Enriched in Supragingival plaque
ID	Category	%Median (supragingival-plaque-mtr)	%MAD (supragingival-plaque-mtr)	%Median (tongue-dorsum-mtr)	%MAD (tongue-dorsum-mtr)	Median Ratio	P-Value	P-Value (Bonf. Corr.)
201174	Actinobacteria	22.9923	11.7959	11.2772	7.0115	2.039	0	0
6073	Cnidaria	0.0425	0.0159	0.0218	0.0065	1.95	0	0
6656	Arthropoda	0.2125	0.0658	0.1251	0.0308	1.699	0	0
6231	Nematoda	0.0273	0.0085	0.0171	0.0052	1.596	0	0
7586	Echinodermata	0.022	0.0076	0.0139	0.0033	1.583	0	0
142182	Gemmatimonadetes	0.0384	0.0093	0.0247	0.0077	1.555	2e-06	8.4e-05
4890	Ascomycota	0.2633	0.0581	0.1742	0.039	1.511	0	0
1297	Deinococcus-Thermus	0.2051	0.0426	0.1426	0.0497	1.438	3.3e-05	0.001386
35493	Streptophyta	0.1916	0.05	0.1348	0.0331	1.421	3.7e-05	0.001554
5204	Basidiomycota	0.0457	0.0119	0.0329	0.005	1.389	1e-06	4.2e-05
3041	Chlorophyta	0.0318	0.0086	0.0234	0.0077	1.359	0.000446	0.018732
5794	Apicomplexa	0.0525	0.0111	0.0391	0.0064	1.343	3e-06	0.000126
57723	Acidobacteria	0.1114	0.028	0.0843	0.0258	1.321	0.001089	0.045738
6157	Platyhelminthes	0.0048	0.0012	0.0037	0.0007	1.297	0.000371	0.015582
Enriched in Tongue dorsum
ID	Category	%Median (supragingival-plaque-mtr)	%MAD (supragingival-plaque-mtr)	%Median (tongue-dorsum-mtr)	%MAD (tongue-dorsum-mtr)	Median Ratio	P-Value	P-Value (Bonf. Corr.)
1239	Firmicutes	22.4578	6.4718	43.4014	8.9439	0.517	1e-06	4.2e-05

## Sheet: ms_buccal_vs_plaque
Supplementary Table S3
METASTATS non-parametric t-test (buccal mucosa vs. supragingival plaque)
----------------------------------------------------------
JCVI Metagenomics Reports - Comparison Results - METASTATS non-parametric t-test
Version:	1.2.4-beta
Date:		April 27, 2011, 8:41 am
Query:		*:* NOT blast_tree:7711
Datasets:
		buccal-mucosa-mtr
		supragingival-plaque-mtr
----------------------------------------------------------
Enriched in Buccal muccosa
ID	Category	Total (buccal-mucosa-mtr)	%Mean (buccal-mucosa-mtr)	Variance (buccal-mucosa-mtr)	%SE (buccal-mucosa-mtr)	Total (supragingival-plaque-mtr)	%Mean (supragingival-plaque-mtr)	Variance (supragingival-plaque-mtr)	%SE (supragingival-plaque-mtr)	Mean Ratio	P-Value	P-Value (Bonf. Corr.)
1239	Firmicutes	4.22293e+08	58.7815	0.023288	1.4169	3.71339e+08	24.6683	0.008148	0.9568	2.383	0.0001	0.0042
Enriched in Supragingival plaque
ID	Category	Total (buccal-mucosa-mtr)	%Mean (buccal-mucosa-mtr)	Variance (buccal-mucosa-mtr)	%SE (buccal-mucosa-mtr)	Total (supragingival-plaque-mtr)	%Mean (supragingival-plaque-mtr)	Variance (supragingival-plaque-mtr)	%SE (supragingival-plaque-mtr)	Mean Ratio	P-Value	P-Value (Bonf. Corr.)
7586	Echinodermata	54869.7	0.0091	0	0.0007	369718	0.0481	5e-06	0.0233	0.19	0.0001	0.0042
6656	Arthropoda	665264	0.101	1e-06	0.0068	3.37961e+06	0.4229	0.000349	0.198	0.239	0.0001	0.0042
201174	Actinobacteria	4.05302e+07	6.7222	0.005955	0.7165	3.61012e+08	24.9063	0.013186	1.2172	0.27	0.0001	0.0042
6073	Cnidaria	89389.5	0.0139	0	0.001	650959	0.0498	1e-06	0.0086	0.279	0.0001	0.0042
3041	Chlorophyta	81906.4	0.013	0	0.0008	500342	0.0464	2e-06	0.0136	0.28	0.0001	0.0042
6231	Nematoda	72315.7	0.0114	0	0.0008	444092	0.0388	1e-06	0.0094	0.294	0.0001	0.0042
976	Bacteroidetes	2.11064e+07	2.8696	0.000631	0.2332	1.47103e+08	8.9713	0.002589	0.5394	0.32	0.0001	0.0042
203691	Spirochaetes	1.26234e+06	0.1909	2e-06	0.0133	9.16766e+06	0.5936	3.2e-05	0.0603	0.322	0.0001	0.0042
35493	Streptophyta	527471	0.0851	0	0.005	3.00456e+06	0.2625	3.8e-05	0.0654	0.324	0.0001	0.0042
142182	Gemmatimonadetes	90216.4	0.0133	0	0.0007	588601	0.0388	0	0.0012	0.342	0.0001	0.0042
6157	Platyhelminthes	14679.2	0.0023	0	0.0002	72004.4	0.0064	0	0.0017	0.354	0.0001	0.0042
32066	Fusobacteria	9.59034e+06	1.186	0.000173	0.1223	5.65738e+07	3.3307	0.000603	0.2604	0.356	0.0001	0.0042
10226	Placozoa	19946.5	0.0034	0	0.0004	116854	0.0089	0	0.0014	0.38	0.0001	0.0042
1297	Deinococcus-Thermus	513540	0.077	0	0.0038	3.02946e+06	0.2015	0	0.0056	0.382	0.0001	0.0042
2836	Bacillariophyta	52598.6	0.0081	0	0.0005	280179	0.0207	0	0.0025	0.389	0.0001	0.0042
4890	Ascomycota	857844	0.1455	7e-06	0.0252	4.22633e+06	0.3689	7e-05	0.0886	0.394	0.0001	0.0042
204428	Chlamydiae	190247	0.0268	0	0.0014	1.0785e+06	0.0676	0	0.0028	0.396	0.0001	0.0042
508458	Synergistetes	205523	0.0301	0	0.0016	1.18662e+06	0.0746	0	0.0036	0.403	0.0001	0.0042
51967	Korarchaeota	17504.7	0.0025	0	0.0001	94427.4	0.0062	0	0.0003	0.408	0.0001	0.0042
74201	Verrucomicrobia	372036	0.0538	0	0.0026	2.04923e+06	0.132	0	0.0045	0.408	0.0001	0.0042
57723	Acidobacteria	318067	0.047	0	0.0021	1.73219e+06	0.1137	0	0.0033	0.413	0.0001	0.0042
1090	Chlorobi	1.17086e+06	0.167	1e-06	0.0096	6.44952e+06	0.4024	2e-06	0.0167	0.415	0.0001	0.0042
203682	Planctomycetes	173322	0.0255	0	0.0012	919277	0.0603	0	0.0019	0.423	0.0001	0.0042
74152	Elusimicrobia	68576.2	0.0096	0	0.0005	350157	0.0218	0	0.0009	0.442	0.0001	0.0042
200795	Chloroflexi	1.10795e+06	0.1906	1.1e-05	0.0305	6.44646e+06	0.4284	2e-06	0.0144	0.445	0.0001	0.0042
200783	Aquificae	529940	0.0753	0	0.0037	2.63862e+06	0.1651	0	0.0065	0.456	0.0001	0.0042
28889	Crenarchaeota	381360	0.0548	0	0.0019	1.72496e+06	0.1203	1e-06	0.0085	0.456	0.0001	0.0042
200930	Deferribacteres	282294	0.0403	0	0.0019	1.3867e+06	0.0859	0	0.0037	0.469	0.0001	0.0042
1117	Cyanobacteria	2.39927e+06	0.3688	9e-06	0.0281	1.18859e+07	0.7851	6e-06	0.0267	0.47	0.0001	0.0042
5794	Apicomplexa	191938	0.0292	0	0.0016	797918	0.0613	1e-06	0.0092	0.476	0.0001	0.0042
6029	Microsporidia	3212.17	0.0005	0	0	13491.9	0.0009	0	0.0001	0.495	0.0001	0.0042
40117	Nitrospirae	110915	0.0161	0	0.0009	518240	0.0321	0	0.0015	0.502	0.0001	0.0042
200918	Thermotogae	990898	0.1417	0	0.0062	4.44436e+06	0.2767	1e-06	0.0119	0.512	0.0001	0.0042
28890	Euryarchaeota	1.92778e+06	0.2783	1e-06	0.0101	8.25638e+06	0.5357	2e-06	0.0157	0.52	0.0001	0.0042
68297	Dictyoglomi	235914	0.0337	0	0.0015	1.03393e+06	0.0643	0	0.0027	0.523	0.0001	0.0042
192989	Nanoarchaeota	4609.98	0.0006	0	0	17553.4	0.0011	0	0.0001	0.545	0.0001	0.0042
65842	Fibrobacteres	248967	0.0352	0	0.0015	974718	0.0612	0	0.0031	0.576	0.0001	0.0042
651137	Thaumarchaeota	27287.6	0.004	0	0.0002	104624	0.0069	0	0.0003	0.583	0.0001	0.0042
544448	Tenericutes	887948	0.1271	0	0.0044	2.72778e+06	0.1724	1e-06	0.0075	0.737	0.0001	0.0042

## Sheet: ms_buccal_vs_tongue
Supplementary Table S3
METASTATS non-parametric t-test (buccal mucosa vs. tongue dorsum)
----------------------------------------------------------
JCVI Metagenomics Reports - Comparison Results - METASTATS non-parametric t-test
Version:	1.2.4-beta
Date:		April 27, 2011, 8:45 am
Query:		*:* NOT blast_tree:7711
Datasets:
		buccal-mucosa-mtr
		tongue-dorsum-mtr
----------------------------------------------------------
Enriched in Buccal mucosa
ID	Category	Total (buccal-mucosa-mtr)	%Mean (buccal-mucosa-mtr)	Variance (buccal-mucosa-mtr)	%SE (buccal-mucosa-mtr)	Total (tongue-dorsum-mtr)	%Mean (tongue-dorsum-mtr)	Variance (tongue-dorsum-mtr)	%SE (tongue-dorsum-mtr)	Mean Ratio	P-Value	P-Value (Bonf. Corr.)
1239	Firmicutes	4.22293e+08	58.7815	0.023288	1.4169	1.98103e+08	40.044	0.01811	2.806	1.468	0.0001	0.0042
Enriched in Tongue
ID	Category	Total (buccal-mucosa-mtr)	%Mean (buccal-mucosa-mtr)	Variance (buccal-mucosa-mtr)	%SE (buccal-mucosa-mtr)	Total (tongue-dorsum-mtr)	%Mean (tongue-dorsum-mtr)	Variance (tongue-dorsum-mtr)	%SE (tongue-dorsum-mtr)	Mean Ratio	P-Value	P-Value (Bonf. Corr.)
508458	Synergistetes	205523	0.0301	0	0.0016	371650	0.0745	0	0.0044	0.404	0.0001	0.0042
51967	Korarchaeota	17504.7	0.0025	0	0.0001	30933	0.0061	0	0.0004	0.415	0.0001	0.0042
74152	Elusimicrobia	68576.2	0.0096	0	0.0005	112452	0.0224	0	0.0015	0.429	0.0001	0.0042
200783	Aquificae	529940	0.0753	0	0.0037	860385	0.1716	0	0.0103	0.439	0.0001	0.0042
204428	Chlamydiae	190247	0.0268	0	0.0014	301965	0.0604	0	0.0041	0.443	0.0001	0.0042
200930	Deferribacteres	282294	0.0403	0	0.0019	453182	0.0906	0	0.0056	0.445	0.0001	0.0042
68297	Dictyoglomi	235914	0.0337	0	0.0015	375208	0.0748	0	0.0044	0.45	0.0001	0.0042
976	Bacteroidetes	2.11064e+07	2.8696	0.000631	0.2332	3.05189e+07	6.2326	0.000838	0.6037	0.46	0.0002	0.0084
74201	Verrucomicrobia	372036	0.0538	0	0.0026	583916	0.1167	0	0.0063	0.461	0.0001	0.0042
1090	Chlorobi	1.17086e+06	0.167	1e-06	0.0096	1.75153e+06	0.3525	1e-06	0.0221	0.474	0.0001	0.0042
40117	Nitrospirae	110915	0.0161	0	0.0009	167993	0.0337	0	0.0022	0.478	0.0001	0.0042
200918	Thermotogae	990898	0.1417	0	0.0062	1.47736e+06	0.2954	1e-06	0.0185	0.48	0.0001	0.0042
65842	Fibrobacteres	248967	0.0352	0	0.0015	367200	0.0733	0	0.0051	0.48	0.0001	0.0042
203682	Planctomycetes	173322	0.0255	0	0.0012	262874	0.0525	0	0.0027	0.487	0.0001	0.0042
142182	Gemmatimonadetes	90216.4	0.0133	0	0.0007	136356	0.0271	0	0.0015	0.49	0.0001	0.0042
1297	Deinococcus-Thermus	513540	0.077	0	0.0038	773490	0.1531	0	0.0082	0.503	0.0001	0.0042
57723	Acidobacteria	318067	0.047	0	0.0021	464666	0.0925	0	0.0047	0.508	0.0001	0.0042
2836	Bacillariophyta	52598.6	0.0081	0	0.0005	79096.3	0.0157	0	0.0009	0.511	0.0001	0.0042
3041	Chlorophyta	81906.4	0.013	0	0.0008	127532	0.0253	0	0.0014	0.514	0.0001	0.0042
10226	Placozoa	19946.5	0.0034	0	0.0004	31959	0.0064	0	0.0004	0.533	0.0001	0.0042
28890	Euryarchaeota	1.92778e+06	0.2783	1e-06	0.0101	2.60206e+06	0.5187	2e-06	0.028	0.537	0.0001	0.0042
203691	Spirochaetes	1.26234e+06	0.1909	2e-06	0.0133	1.76041e+06	0.3528	1e-06	0.0228	0.541	0.0001	0.0042
651137	Thaumarchaeota	27287.6	0.004	0	0.0002	37144.9	0.0074	0	0.0003	0.543	0.0001	0.0042
28889	Crenarchaeota	381360	0.0548	0	0.0019	505564	0.1003	0	0.0047	0.547	0.0001	0.0042
1117	Cyanobacteria	2.39927e+06	0.3688	9e-06	0.0281	3.38669e+06	0.6729	2e-06	0.0323	0.548	0.0001	0.0042
200795	Chloroflexi	1.10795e+06	0.1906	1.1e-05	0.0305	1.75816e+06	0.348	1e-06	0.0221	0.548	0.0001	0.0042
35493	Streptophyta	527471	0.0851	0	0.005	750007	0.1481	0	0.0103	0.574	0.0001	0.0042
544448	Tenericutes	887948	0.1271	0	0.0044	1.05046e+06	0.2101	0	0.0142	0.605	0.0001	0.0042
6157	Platyhelminthes	14679.2	0.0023	0	0.0002	18515.2	0.0038	0	0.0002	0.608	0.0001	0.0042
6073	Cnidaria	89389.5	0.0139	0	0.001	112053	0.0226	0	0.0014	0.616	0.0001	0.0042
6231	Nematoda	72315.7	0.0114	0	0.0008	88842.1	0.0178	0	0.0013	0.642	0.0008	0.0336
5794	Apicomplexa	191938	0.0292	0	0.0016	194990	0.0391	0	0.0016	0.747	0.0004	0.0168

## Sheet: ms_plaque_vs_tongue
Supplementary Table S3
METASTATS non-parametric t-test (supragingival plaque vs. tongue dorsum)
----------------------------------------------------------
JCVI Metagenomics Reports - Comparison Results - METASTATS non-parametric t-test
Version:	1.2.4-beta
Date:		April 27, 2011, 8:45 am
Query:		*:* NOT blast_tree:7711
Datasets:
		supragingival-plaque-mtr
		tongue-dorsum-mtr
----------------------------------------------------------
Enriched in Supragingival plaque
ID	Category	Total (supragingival-plaque-mtr)	%Mean (supragingival-plaque-mtr)	Variance (supragingival-plaque-mtr)	%SE (supragingival-plaque-mtr)	Total (tongue-dorsum-mtr)	%Mean (tongue-dorsum-mtr)	Variance (tongue-dorsum-mtr)	%SE (tongue-dorsum-mtr)	Mean Ratio	P-Value	P-Value (Bonf. Corr.)
7586	Echinodermata	369718	0.0481	5e-06	0.0233	71691.3	0.0144	0	0.0012	3.337	0.0001	0.0042
6656	Arthropoda	3.37961e+06	0.4229	0.000349	0.198	640116	0.128	0	0.0086	3.304	0.0001	0.0042
5204	Basidiomycota	736736	0.0802	9e-06	0.0311	165906	0.0333	0	0.0018	2.408	0.0001	0.0042
6073	Cnidaria	650959	0.0498	1e-06	0.0086	112053	0.0226	0	0.0014	2.21	0.0001	0.0042
6231	Nematoda	444092	0.0388	1e-06	0.0094	88842.1	0.0178	0	0.0013	2.181	0.0001	0.0042
201174	Actinobacteria	3.61012e+08	24.9063	0.013186	1.2172	6.11768e+07	11.726	0.002823	1.1079	2.124	0.0001	0.0042
4890	Ascomycota	4.22633e+06	0.3689	7e-05	0.0886	892525	0.1775	0	0.0088	2.079	0.0001	0.0042
3041	Chlorophyta	500342	0.0464	2e-06	0.0136	127532	0.0253	0	0.0014	1.833	0.0002	0.0084
35493	Streptophyta	3.00456e+06	0.2625	3.8e-05	0.0654	750007	0.1481	0	0.0103	1.772	0.0002	0.0084
6157	Platyhelminthes	72004.4	0.0064	0	0.0017	18515.2	0.0038	0	0.0002	1.716	0.0003	0.0126
5794	Apicomplexa	797918	0.0613	1e-06	0.0092	194990	0.0391	0	0.0016	1.569	0.0001	0.0042
6029	Microsporidia	13491.9	0.0009	0	0.0001	3117.21	0.0006	0	0	1.454	0.0006	0.0252
142182	Gemmatimonadetes	588601	0.0388	0	0.0012	136356	0.0271	0	0.0015	1.43	0.0001	0.0042
1297	Deinococcus-Thermus	3.02946e+06	0.2015	0	0.0056	773490	0.1531	0	0.0082	1.316	0.0001	0.0042
57723	Acidobacteria	1.73219e+06	0.1137	0	0.0033	464666	0.0925	0	0.0047	1.229	0.0008	0.0336
Enriched in Tongue dorsum
ID	Category	Total (supragingival-plaque-mtr)	%Mean (supragingival-plaque-mtr)	Variance (supragingival-plaque-mtr)	%SE (supragingival-plaque-mtr)	Total (tongue-dorsum-mtr)	%Mean (tongue-dorsum-mtr)	Variance (tongue-dorsum-mtr)	%SE (tongue-dorsum-mtr)	Mean Ratio	P-Value	P-Value (Bonf. Corr.)
1239	Firmicutes	3.71339e+08	24.6683	0.008148	0.9568	1.98103e+08	40.044	0.01811	2.806	0.616	0.0001	0.0042
