# Supplementary material for: A Case Study for Large-Scale Human Microbiome Analysis Using JCVI’s Metagenomics Reports (METAREP)
Source: PLoS One. 2012 Jun 13;7(6):e29044. doi: 10.1371/journal.pone.0029044 (PMC3374610; doi:10.1371/journal.pone.0029044)
Supplement: Table S5 — Query response benchmark statistics. (XLS) [file pone.0029044.s008.xls]

## Sheet: query response benchmark
Supplementary Table S5
Query Response Benchmark
type=0 weighted undistributed search
type=1 weighted distributed search
type=2 unweighted undistributed search
type=3 unweighted distributed search
qtime	docs	query	type
14115	22501291	blast_tree:1239	0
14127	22501291	blast_tree:1239	0
14110	22501291	blast_tree:1239	0
14135	22501291	blast_tree:1239	0
14108	22501291	blast_tree:1239	0
14117	22501291	blast_tree:1239	0
14159	22501291	blast_tree:1239	0
14113	22501291	blast_tree:1239	0
14109	22501291	blast_tree:1239	0
14108	22501291	blast_tree:1239	0
6042	9732198	blast_tree:28216	0
6046	9732198	blast_tree:28216	0
6038	9732198	blast_tree:28216	0
6036	9732198	blast_tree:28216	0
6181	9732198	blast_tree:28216	0
6037	9732198	blast_tree:28216	0
6042	9732198	blast_tree:28216	0
6037	9732198	blast_tree:28216	0
6033	9732198	blast_tree:28216	0
6028	9732198	blast_tree:28216	0
24736	41070980	kegg_tree:2	0
24706	41070980	kegg_tree:2	0
24715	41070980	kegg_tree:2	0
24713	41070980	kegg_tree:2	0
24716	41070980	kegg_tree:2	0
24857	41070980	kegg_tree:2	0
24848	41070980	kegg_tree:2	0
24684	41070980	kegg_tree:2	0
24713	41070980	kegg_tree:2	0
24738	41070980	kegg_tree:2	0
17352	29460438	blast_tree:1236	0
17347	29460438	blast_tree:1236	0
17536	29460438	blast_tree:1236	0
17392	29460438	blast_tree:1236	0
17491	29460438	blast_tree:1236	0
17345	29460438	blast_tree:1236	0
17355	29460438	blast_tree:1236	0
17352	29460438	blast_tree:1236	0
17348	29460438	blast_tree:1236	0
17342	29460438	blast_tree:1236	0
30602	52387538	blast_tree:1224	0
30549	52387538	blast_tree:1224	0
30713	52387538	blast_tree:1224	0
30537	52387538	blast_tree:1224	0
30564	52387538	blast_tree:1224	0
30567	52387538	blast_tree:1224	0
30588	52387538	blast_tree:1224	0
30565	52387538	blast_tree:1224	0
30552	52387538	blast_tree:1224	0
30671	52387538	blast_tree:1224	0
684	1029356	blast_tree:72294	0
682	1029356	blast_tree:72294	0
682	1029356	blast_tree:72294	0
683	1029356	blast_tree:72294	0
700	1029356	blast_tree:72294	0
674	1029356	blast_tree:72294	0
682	1029356	blast_tree:72294	0
681	1029356	blast_tree:72294	0
685	1029356	blast_tree:72294	0
686	1029356	blast_tree:72294	0
57579	95828190	blast_tree:2	0
57677	95828190	blast_tree:2	0
58502	95828190	blast_tree:2	0
57557	95828190	blast_tree:2	0
58581	95828190	blast_tree:2	0
57697	95828190	blast_tree:2	0
57547	95828190	blast_tree:2	0
57576	95828190	blast_tree:2	0
57581	95828190	blast_tree:2	0
57640	95828190	blast_tree:2	0
38486	64420487	kegg_tree:1	0
38511	64420487	kegg_tree:1	0
38486	64420487	kegg_tree:1	0
38559	64420487	kegg_tree:1	0
38490	64420487	kegg_tree:1	0
38516	64420487	kegg_tree:1	0
38485	64420487	kegg_tree:1	0
38500	64420487	kegg_tree:1	0
38547	64420487	kegg_tree:1	0
38485	64420487	kegg_tree:1	0
48773	80575873	kegg_tree:2+OR+kegg_tree:0	0
48567	80575873	kegg_tree:2+OR+kegg_tree:0	0
48509	80575873	kegg_tree:2+OR+kegg_tree:0	0
48648	80575873	kegg_tree:2+OR+kegg_tree:0	0
48646	80575873	kegg_tree:2+OR+kegg_tree:0	0
48678	80575873	kegg_tree:2+OR+kegg_tree:0	0
48710	80575873	kegg_tree:2+OR+kegg_tree:0	0
48738	80575873	kegg_tree:2+OR+kegg_tree:0	0
48640	80575873	kegg_tree:2+OR+kegg_tree:0	0
48663	80575873	kegg_tree:2+OR+kegg_tree:0	0
62512	103925380	*:*	0
62542	103925380	*:*	0
62647	103925380	*:*	0
62794	103925380	*:*	0
62563	103925380	*:*	0
62602	103925380	*:*	0
62502	103925380	*:*	0
62552	103925380	*:*	0
62512	103925380	*:*	0
62625	103925380	*:*	0
1727	22501291	blast_tree:1239	1
1716	22501291	blast_tree:1239	1
1710	22501291	blast_tree:1239	1
1814	22501291	blast_tree:1239	1
1707	22501291	blast_tree:1239	1
1681	22501291	blast_tree:1239	1
1719	22501291	blast_tree:1239	1
1713	22501291	blast_tree:1239	1
1682	22501291	blast_tree:1239	1
1788	22501291	blast_tree:1239	1
888	9732198	blast_tree:28216	1
897	9732198	blast_tree:28216	1
895	9732198	blast_tree:28216	1
899	9732198	blast_tree:28216	1
884	9732198	blast_tree:28216	1
899	9732198	blast_tree:28216	1
893	9732198	blast_tree:28216	1
895	9732198	blast_tree:28216	1
899	9732198	blast_tree:28216	1
898	9732198	blast_tree:28216	1
3245	41070980	kegg_tree:2	1
3285	41070980	kegg_tree:2	1
3238	41070980	kegg_tree:2	1
3355	41070980	kegg_tree:2	1
3259	41070980	kegg_tree:2	1
3243	41070980	kegg_tree:2	1
3326	41070980	kegg_tree:2	1
3235	41070980	kegg_tree:2	1
3259	41070980	kegg_tree:2	1
3242	41070980	kegg_tree:2	1
2467	29460438	blast_tree:1236	1
2361	29460438	blast_tree:1236	1
2347	29460438	blast_tree:1236	1
2358	29460438	blast_tree:1236	1
2363	29460438	blast_tree:1236	1
2444	29460438	blast_tree:1236	1
2361	29460438	blast_tree:1236	1
2366	29460438	blast_tree:1236	1
2350	29460438	blast_tree:1236	1
2321	29460438	blast_tree:1236	1
4119	52387538	blast_tree:1224	1
4145	52387538	blast_tree:1224	1
4240	52387538	blast_tree:1224	1
4140	52387538	blast_tree:1224	1
4125	52387538	blast_tree:1224	1
4112	52387538	blast_tree:1224	1
4275	52387538	blast_tree:1224	1
4169	52387538	blast_tree:1224	1
4141	52387538	blast_tree:1224	1
4254	52387538	blast_tree:1224	1
126	1029356	blast_tree:72294	1
122	1029356	blast_tree:72294	1
122	1029356	blast_tree:72294	1
122	1029356	blast_tree:72294	1
123	1029356	blast_tree:72294	1
120	1029356	blast_tree:72294	1
121	1029356	blast_tree:72294	1
122	1029356	blast_tree:72294	1
121	1029356	blast_tree:72294	1
122	1029356	blast_tree:72294	1
7375	95828190	blast_tree:2	1
7186	95828190	blast_tree:2	1
7317	95828190	blast_tree:2	1
7366	95828190	blast_tree:2	1
7272	95828190	blast_tree:2	1
7310	95828190	blast_tree:2	1
7193	95828190	blast_tree:2	1
7287	95828190	blast_tree:2	1
7258	95828190	blast_tree:2	1
7339	95828190	blast_tree:2	1
5081	64420487	kegg_tree:1	1
4975	64420487	kegg_tree:1	1
4994	64420487	kegg_tree:1	1
5008	64420487	kegg_tree:1	1
5014	64420487	kegg_tree:1	1
4997	64420487	kegg_tree:1	1
5044	64420487	kegg_tree:1	1
4994	64420487	kegg_tree:1	1
4958	64420487	kegg_tree:1	1
5061	64420487	kegg_tree:1	1
6312	80575873	kegg_tree:2+OR+kegg_tree:0	1
6217	80575873	kegg_tree:2+OR+kegg_tree:0	1
6340	80575873	kegg_tree:2+OR+kegg_tree:0	1
6225	80575873	kegg_tree:2+OR+kegg_tree:0	1
6308	80575873	kegg_tree:2+OR+kegg_tree:0	1
6276	80575873	kegg_tree:2+OR+kegg_tree:0	1
6395	80575873	kegg_tree:2+OR+kegg_tree:0	1
6232	80575873	kegg_tree:2+OR+kegg_tree:0	1
6224	80575873	kegg_tree:2+OR+kegg_tree:0	1
6380	80575873	kegg_tree:2+OR+kegg_tree:0	1
8041	103925380	*:*	1
8055	103925380	*:*	1
8031	103925380	*:*	1
8081	103925380	*:*	1
8051	103925380	*:*	1
8038	103925380	*:*	1
8091	103925380	*:*	1
7965	103925380	*:*	1
8118	103925380	*:*	1
7980	103925380	*:*	1
1	22501291	blast_tree:1239	2
1	22501291	blast_tree:1239	2
1	22501291	blast_tree:1239	2
1	22501291	blast_tree:1239	2
0	22501291	blast_tree:1239	2
1	22501291	blast_tree:1239	2
0	22501291	blast_tree:1239	2
0	22501291	blast_tree:1239	2
1	22501291	blast_tree:1239	2
1	22501291	blast_tree:1239	2
1	9732198	blast_tree:28216	2
1	9732198	blast_tree:28216	2
1	9732198	blast_tree:28216	2
1	9732198	blast_tree:28216	2
1	9732198	blast_tree:28216	2
1	9732198	blast_tree:28216	2
1	9732198	blast_tree:28216	2
1	9732198	blast_tree:28216	2
1	9732198	blast_tree:28216	2
1	9732198	blast_tree:28216	2
0	41070980	kegg_tree:2	2
0	41070980	kegg_tree:2	2
0	41070980	kegg_tree:2	2
1	41070980	kegg_tree:2	2
1	41070980	kegg_tree:2	2
1	41070980	kegg_tree:2	2
1	41070980	kegg_tree:2	2
0	41070980	kegg_tree:2	2
1	41070980	kegg_tree:2	2
1	41070980	kegg_tree:2	2
0	29460438	blast_tree:1236	2
0	29460438	blast_tree:1236	2
0	29460438	blast_tree:1236	2
1	29460438	blast_tree:1236	2
1	29460438	blast_tree:1236	2
0	29460438	blast_tree:1236	2
1	29460438	blast_tree:1236	2
1	29460438	blast_tree:1236	2
1	29460438	blast_tree:1236	2
1	29460438	blast_tree:1236	2
0	52387538	blast_tree:1224	2
0	52387538	blast_tree:1224	2
1	52387538	blast_tree:1224	2
1	52387538	blast_tree:1224	2
1	52387538	blast_tree:1224	2
1	52387538	blast_tree:1224	2
0	52387538	blast_tree:1224	2
1	52387538	blast_tree:1224	2
1	52387538	blast_tree:1224	2
1	52387538	blast_tree:1224	2
1	1029356	blast_tree:72294	2
1	1029356	blast_tree:72294	2
1	1029356	blast_tree:72294	2
1	1029356	blast_tree:72294	2
0	1029356	blast_tree:72294	2
1	1029356	blast_tree:72294	2
1	1029356	blast_tree:72294	2
1	1029356	blast_tree:72294	2
1	1029356	blast_tree:72294	2
0	1029356	blast_tree:72294	2
1	95828190	blast_tree:2	2
1	95828190	blast_tree:2	2
1	95828190	blast_tree:2	2
0	95828190	blast_tree:2	2
1	95828190	blast_tree:2	2
1	95828190	blast_tree:2	2
0	95828190	blast_tree:2	2
1	95828190	blast_tree:2	2
1	95828190	blast_tree:2	2
1	95828190	blast_tree:2	2
1	64420487	kegg_tree:1	2
0	64420487	kegg_tree:1	2
1	64420487	kegg_tree:1	2
0	64420487	kegg_tree:1	2
1	64420487	kegg_tree:1	2
1	64420487	kegg_tree:1	2
1	64420487	kegg_tree:1	2
0	64420487	kegg_tree:1	2
1	64420487	kegg_tree:1	2
1	64420487	kegg_tree:1	2
1	80575873	kegg_tree:2+OR+kegg_tree:0	2
1	80575873	kegg_tree:2+OR+kegg_tree:0	2
1	80575873	kegg_tree:2+OR+kegg_tree:0	2
1	80575873	kegg_tree:2+OR+kegg_tree:0	2
1	80575873	kegg_tree:2+OR+kegg_tree:0	2
0	80575873	kegg_tree:2+OR+kegg_tree:0	2
1	80575873	kegg_tree:2+OR+kegg_tree:0	2
1	80575873	kegg_tree:2+OR+kegg_tree:0	2
1	80575873	kegg_tree:2+OR+kegg_tree:0	2
1	80575873	kegg_tree:2+OR+kegg_tree:0	2
0	103925380	*:*	2
1	103925380	*:*	2
1	103925380	*:*	2
1	103925380	*:*	2
0	103925380	*:*	2
1	103925380	*:*	2
0	103925380	*:*	2
1	103925380	*:*	2
0	103925380	*:*	2
1	103925380	*:*	2
49	22501291	blast_tree:1239	3
51	22501291	blast_tree:1239	3
49	22501291	blast_tree:1239	3
135	22501291	blast_tree:1239	3
50	22501291	blast_tree:1239	3
47	22501291	blast_tree:1239	3
54	22501291	blast_tree:1239	3
50	22501291	blast_tree:1239	3
50	22501291	blast_tree:1239	3
53	22501291	blast_tree:1239	3
51	9732198	blast_tree:28216	3
50	9732198	blast_tree:28216	3
51	9732198	blast_tree:28216	3
54	9732198	blast_tree:28216	3
52	9732198	blast_tree:28216	3
51	9732198	blast_tree:28216	3
53	9732198	blast_tree:28216	3
52	9732198	blast_tree:28216	3
52	9732198	blast_tree:28216	3
49	9732198	blast_tree:28216	3
48	41070980	kegg_tree:2	3
51	41070980	kegg_tree:2	3
52	41070980	kegg_tree:2	3
52	41070980	kegg_tree:2	3
55	41070980	kegg_tree:2	3
52	41070980	kegg_tree:2	3
51	41070980	kegg_tree:2	3
51	41070980	kegg_tree:2	3
49	41070980	kegg_tree:2	3
54	41070980	kegg_tree:2	3
51	29460438	blast_tree:1236	3
52	29460438	blast_tree:1236	3
52	29460438	blast_tree:1236	3
51	29460438	blast_tree:1236	3
52	29460438	blast_tree:1236	3
51	29460438	blast_tree:1236	3
52	29460438	blast_tree:1236	3
51	29460438	blast_tree:1236	3
52	29460438	blast_tree:1236	3
52	29460438	blast_tree:1236	3
48	52387538	blast_tree:1224	3
50	52387538	blast_tree:1224	3
52	52387538	blast_tree:1224	3
52	52387538	blast_tree:1224	3
51	52387538	blast_tree:1224	3
52	52387538	blast_tree:1224	3
53	52387538	blast_tree:1224	3
51	52387538	blast_tree:1224	3
50	52387538	blast_tree:1224	3
54	52387538	blast_tree:1224	3
52	1029356	blast_tree:72294	3
52	1029356	blast_tree:72294	3
51	1029356	blast_tree:72294	3
51	1029356	blast_tree:72294	3
49	1029356	blast_tree:72294	3
51	1029356	blast_tree:72294	3
52	1029356	blast_tree:72294	3
53	1029356	blast_tree:72294	3
51	1029356	blast_tree:72294	3
51	1029356	blast_tree:72294	3
51	95828190	blast_tree:2	3
53	95828190	blast_tree:2	3
49	95828190	blast_tree:2	3
51	95828190	blast_tree:2	3
54	95828190	blast_tree:2	3
52	95828190	blast_tree:2	3
53	95828190	blast_tree:2	3
49	95828190	blast_tree:2	3
50	95828190	blast_tree:2	3
49	95828190	blast_tree:2	3
51	64420487	kegg_tree:1	3
51	64420487	kegg_tree:1	3
51	64420487	kegg_tree:1	3
50	64420487	kegg_tree:1	3
51	64420487	kegg_tree:1	3
50	64420487	kegg_tree:1	3
53	64420487	kegg_tree:1	3
49	64420487	kegg_tree:1	3
52	64420487	kegg_tree:1	3
53	64420487	kegg_tree:1	3
48	80575873	kegg_tree:2+OR+kegg_tree:0	3
52	80575873	kegg_tree:2+OR+kegg_tree:0	3
51	80575873	kegg_tree:2+OR+kegg_tree:0	3
51	80575873	kegg_tree:2+OR+kegg_tree:0	3
50	80575873	kegg_tree:2+OR+kegg_tree:0	3
52	80575873	kegg_tree:2+OR+kegg_tree:0	3
49	80575873	kegg_tree:2+OR+kegg_tree:0	3
50	80575873	kegg_tree:2+OR+kegg_tree:0	3
50	80575873	kegg_tree:2+OR+kegg_tree:0	3
51	80575873	kegg_tree:2+OR+kegg_tree:0	3
49	103925380	*:*	3
51	103925380	*:*	3
53	103925380	*:*	3
52	103925380	*:*	3
52	103925380	*:*	3
51	103925380	*:*	3
50	103925380	*:*	3
50	103925380	*:*	3
52	103925380	*:*	3
53	103925380	*:*	3
